# Supplementary material
Source: PubMed Central journal article supplement (PMC4064726)
Supplement: Supp_Fig1.pdf [file Supp_Fig1.pdf]

## Supplementary Data

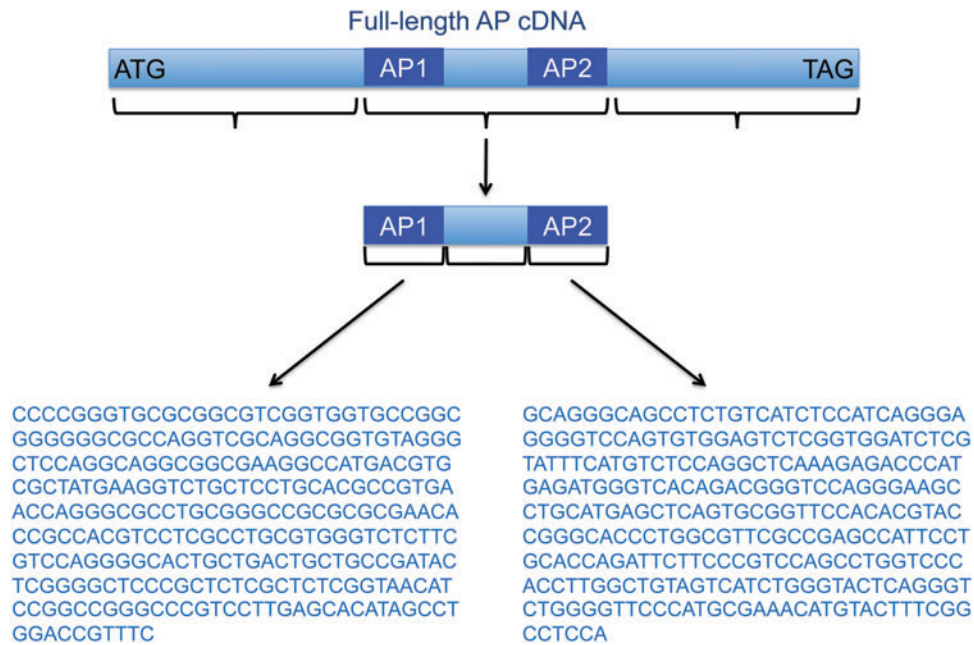

**SUPPLEMENTARY FIG. S1.** Sequence of the AP1 and AP2 fragments used in the tri-AAV vectors. Blue-colored nucleotides in the sequence files are from the *AP* gene.
