# Supplementary material
Source: PubMed Central journal article supplement (PMC4064726)
Supplement: Supp_Fig2.pdf [file Supp_Fig2.pdf]

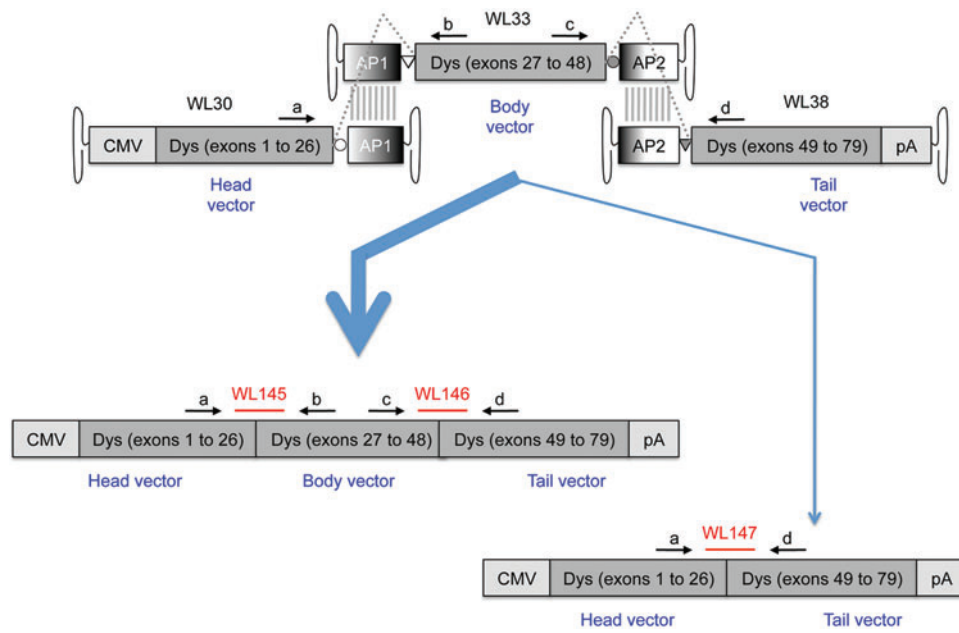

**SUPPLEMENTARY FIG. S2.** Full-length dystrophin expression from the HH tri-AAV vectors. Homologous recombination of the AP1 sequences facilitates the head and body vector reconstitution. Homologous recombination of the AP2 sequences facilitates the body and tail vector reconstitution. Recombination between the head and tail vector is minimal because of a lack of shared homologous region between these two vectors. The locations of the primers and probes used in quantitative RT-PCR for the head-body, body-tail, and head-tail recombination are marked. HH, hybrid-hybrid; RT-PCR, reverse transcription polymerase chain reaction.
